# Supplementary material
Source: HighWire-hosted journal article supplement (https://cmajopen.ca/highwire/filestream/88495/field_highwire_adjunct_files/0/open-2021-0151-1-at.pdf)
Supplement: open-2021-0151-1-at.pdf [file open-2021-0151-1-at.pdf]

**Supplementary Online Material 1.** Overview of data collected.

| <b>Data category</b>                     | <b>Independent variable data capture includes</b>                                                                                                                                                                                                                                                                                           | <b>Data source</b>                                         |
|------------------------------------------|---------------------------------------------------------------------------------------------------------------------------------------------------------------------------------------------------------------------------------------------------------------------------------------------------------------------------------------------|------------------------------------------------------------|
| <b>Baseline Data</b>                     |                                                                                                                                                                                                                                                                                                                                             |                                                            |
| <b>Demographics &amp; History</b>        | Date of hospital presentation<br>Date of ICU admission if applicable<br>Age<br>Sex/ gender<br>Height<br>Weight<br>Comorbidities<br>Home medications                                                                                                                                                                                         | Electronic medical record (EMR), paper chart               |
| <b>Clinical Data</b>                     | History of presenting illness – date of onset of symptoms<br>Clinical presentation including vital signs<br>Initial laboratory tests and any clinically ordered investigations                                                                                                                                                              | Electronic medical record (EMR), paper chart               |
| <b>Daily Data – Admission day 0 to 7</b> |                                                                                                                                                                                                                                                                                                                                             |                                                            |
| <b>Physiologic Data</b>                  | Mean arterial pressure and heart rate<br>Oxygenation and ventilation<br>Renal function and urine output<br>Neurological status<br>Acid-base balance<br>SOFA score                                                                                                                                                                           | EMR, emergency room record, anesthesia record, paper chart |
| <b>Clinical Events</b>                   | Cardiac arrest & cardiopulmonary resuscitation (Y/N)<br>Major Neurologic events (eg seizure, stroke)<br>Major Pulmonary events (eg pulmonary embolism, hypoxic events)<br>Major Cardiac events (eg clinically diagnosed myocardial infarction, arrhythmias)<br>Clinically diagnosed infections (e.g. VAP, line associated infection, other) | EMR, paper chart                                           |

|                                                               |                                                                                                                                                                                                                                                                       |                                                                                    |
|---------------------------------------------------------------|-----------------------------------------------------------------------------------------------------------------------------------------------------------------------------------------------------------------------------------------------------------------------|------------------------------------------------------------------------------------|
| <b>Organ sustaining therapies</b>                             | Mechanical ventilation (Y/N)<br>Vasoactive agents (Number, mean norepi equivalents)<br>Antiarrhythmic therapies (Y/N)<br>Fluid balance<br>Renal replacement therapy (Y/N)<br>Cardiovascular mechanical support (Y/N)                                                  | EMR, bedside nursing records, respiratory therapy ventilation records, paper chart |
| <b>Management &amp; Therapies</b>                             | Antimicrobial administration (Y/N)<br>Procedures related to shock etiology (eg surgical debridement for source control, pericardiocentesis, chest tube placement)<br>Adjunctive therapies (eg corticosteroids)<br>Anticoagulation therapy (eg thrombolytics, heparin) | EMR, paper chart                                                                   |
| <b>Diagnostics Findings [as ordered for clinical reasons]</b> | Laboratory results<br>Microbial culture results<br>Computed tomography scans<br>X-ray findings<br>Echocardiograms (transthoracic and transesophageal)<br>Point-of-care Ultrasound (PoCUS) findings                                                                    | EMR, QPath database, paper chart                                                   |
| <b>Final Status</b>                                           |                                                                                                                                                                                                                                                                       |                                                                                    |
| <b>Vital Status</b>                                           | Date of hospital discharge & destination (eg home vs. long-term care facility, etc) if applicable<br>Date of death in hospital if did not survive to hospital discharge                                                                                               | EMR                                                                                |
